1 tiRNA-Val promotes angiogenesis via Sirt1–Hif-1 $\alpha$  axis in mice with  
2 diabetic retinopathy

3 Yan Xu<sup>1</sup>, Haidong Zou<sup>1,2,3,4,5</sup>, Qi Ding<sup>1</sup>, Yuelan Zou<sup>1</sup>, Chun Tang<sup>1</sup>, Yuyu Lu<sup>1</sup>, Xun  
4 Xu<sup>1,2,3</sup>

6 Corresponding author:

7 Name: Xun Xu<sup>1,2,3</sup>

8 E-mail: drxuxun@sjtu.edu.cn

10 <sup>1</sup>Shanghai Eye Diseases Prevention & Treatment Center/ Shanghai Eye Hospital.

11 <sup>2</sup>Shanghai General Hospital.

12 <sup>3</sup>Shanghai Key Laboratory of Ocular Fundus Diseases.

13 <sup>4</sup>Shanghai Engineering Center for Visual Science and Photomedicine.

14 <sup>5</sup>Shanghai engineering research center of precise diagnosis and treatment of eye  
15 diseases, Shanghai, China (Project No. 19DZ2250100).

18 **Abstract**

19 Diabetic retinopathy (DR) is a specific microvascular complication arising from  
20 diabetes, and its pathogenesis is not completely understood. tRNA-derived stress-  
21 induced RNAs (tiRNAs), a new type of small noncoding RNA generated by specific  
22 cleavage of tRNAs, has become a promising target for several diseases. However, the

23 regulatory function of tiRNAs in DR and its detailed mechanism remain unknown. Here,  
24 we analyzed the tiRNA profiles of normal and DR retinal tissues. The expression level  
25 of tiRNA-Val was significantly upregulated in DR retinal tissues. Consistently, tiRNA-  
26 Val was upregulated in human retinal microvascular endothelial cells (HRMECs) under  
27 high glucose conditions. The overexpression of tiRNA-Val enhanced cell proliferation  
28 and inhibited cell apoptosis in HRMECs, but the knockdown of tiRNA-Val decreased  
29 cell proliferation and promoted cell apoptosis. Mechanistically, tiRNA-Val, derived  
30 from mature tRNA-Val with Ang cleavage, decreased Sirt1 expression level by  
31 interacting with sirt1 3'UTR, leading to the accumulation of Hif-1 $\alpha$ , a key target for DR.  
32 In addition, subretinal injection of adeno-associated virus to knock down tiRNA-Val in  
33 DR mice ameliorated the symptoms of DR. Therefore, these data suggest that tiRNA-  
34 Val is a potential target in treating diabetic retinopathy.

35

36 **Key words:** Diabetic retinopathy; tiRNAs; Sirt1; Hif-1 $\alpha$

37

### 38 **Abbreviations**

|           |                                              |
|-----------|----------------------------------------------|
| 39 DR     | Diabetic retinopathy                         |
| 40 tiRNAs | tRNA-derived stress-induced RNAs             |
| 41 HRMEC  | Human retinal microvascular endothelial cell |
| 42 ncRNAs | Noncoding RNAs                               |

43

### 44 **Introduction**

45           Diabetic retinopathy (DR) is a common and a specific microvascular complication  
46 of diabetes(1), and it remains the leading cause of preventable blindness in working-  
47 aged people(2). It has been reported that one-third of those people with diabetes have  
48 an increased risk of life-threatening systemic vascular complications, such as stroke,  
49 coronary heart disease, and heart failure(3, 4). However, the pathogenesis of the onset  
50 of DR disease is not completely understood as of yet.

51           Noncoding RNAs (ncRNAs) have emerged as critical regulators of various  
52 biological processes in DR, such as cell proliferation, cell motility, immune and  
53 inflammatory responses(5). For example, the expression of MIAT, a long noncoding  
54 RNA (lncRNA), increased in diabetic retinas, while MIAT knockdown ameliorated  
55 diabetes mellitus-induced retinal microvascular dysfunction(6). miRNA-138-5p is  
56 expressed at low levels in the retinal tissues of DR rats and it regulates early DR by  
57 promoting cell proliferation by targeting NOVA1(7). Recently, tRNA cleavage products  
58 have been identified as functional noncoding RNAs, called tRNA-derived stress-  
59 induced RNAs (tiRNAs), tRNA-derived RNA fragments (tRFs), or tRNA-derived  
60 small RNAs (tsRNAs)(8-10). tiRNAs are generated by specific cleavage in the  
61 anticodon loops of mature tRNAs or pre-tRNAs and are 31–40 bases long(11). The  
62 expression pattern of tiRNAs does not correspond to cognate tRNA levels,  
63 demonstrating that tiRNAs are not degradation products and precisely regulate  
64 noncoding RNAs(12). tiRNAs are an emerging class of regulatory non-coding RNAs  
65 that play important roles in regulating a variety of biological processes, such as  
66 competition for ribosomes(13), destabilizing YBX1-Bound mRNAs(14), and target

67 mRNAs(15). However, the role of tiRNAs in DR is yet to be elucidated.

68 In this study, we constructed a DR mouse model with STZ-induced diabetes to  
69 analyze tiRNA profile of normal and DR retinal tissues. The expression level of tiRNA-  
70 Val was significantly upregulated in DR retinal tissues and in human retinal  
71 microvascular endothelial cells (HRMECs) under high glucose condition. tiRNA-Val  
72 enhanced cell proliferation and inhibited apoptosis in HRMECs. In addition, tiRNA-  
73 Val, derived from mature tRNA-Val, decreased Sirt1 expression level by interacting  
74 with Sirt1 3'UTR, leading to the accumulation of Hif-1 $\alpha$ . Moreover, the knockdown of  
75 tiRNA-Val in retinal tissues drastically ameliorated the symptoms of DR *in vivo*. tiRNA-  
76 Val gene may be a potential target for diabetic retinopathy.

77

## 78 **Methods**

### 79 **Cell lines and cell culture**

80 HRMECs were purchased from American type culture collection (ATCC).  
81 HRMECs were cultured in Dulbecco's modified eagle's medium (DMEM) (Sigma-  
82 Aldrich, USA) supplemented with 1% penicillin/streptomycin (100 mg/L, Gibco, USA)  
83 and 10% heat-inactivated fetal bovine serum (FBS) (Gibco, USA) at 37 °C in 5% CO<sub>2</sub>  
84 atmosphere. For normal glucose and high glucose conditions, 5 mM and 33 mM D-  
85 glucose (Gibco, USA) were added to the medium for 48 h, respectively.

86

### 87 **Animals**

88 All animal experiments were approved by the Institutional Animal Care and Use

89 Committee of Shanghai General Hospital and were performed in accordance with the  
90 ARVO Statement for the Use of Animals in Ophthalmic and Vision Research. C57BL/6  
91 male mice were purchased from Shanghai Model Organisms Center. The animals were  
92 housed in cages with free access to regular diet and water in a room at  $22 \pm 1$  °C on a 12  
93 h light/dark cycle. When the mice reached 20–25 g body weight (~2 months of age),  
94 they were randomly assigned into diabetic or nondiabetic group. Diabetes was induced  
95 by five sequential daily intraperitoneal injections of a freshly prepared solution of  
96 streptozotocin in citrate buffer (pH 4.5) at 45 mg/kg body weight. Mice with random  
97 blood glucose levels  $\geq 16.7$  mmol/L at 2 weeks post-STZ were assigned to the diabetes  
98 group and the diabetes duration commenced. The animals had free access to food and  
99 water. Retinal tissues were harvested at 9 months of diabetes for protein extraction,  
100 RNA extraction, and retinal histopathology. Fasting blood glucose levels were  
101 determined repeatedly prior to the 3-month assessment.

102 For subretinal injection, adeno-associated virus (AAV) vector containing sh-  
103 tiRNA-Val under the control of chimeric CMV/chicken  $\beta$ -actin promoter was  
104 constructed. The vectors were administered via subretinal injection two weeks before  
105 STZ induction of diabetes. C57BL/6 male mice were anesthetized and subretinally  
106 injected with 1  $\mu$ L solution containing  $10^{11}$  particles of sh-tiRNA-Val AAV, as previously  
107 described(16). The solution was injected only in one eye for each animal, while the  
108 contralateral eye was used as a control. Retinal tissues were harvested after 9 months  
109 of diabetes.

110

111 **Cell transfection**

112 tiRNA-Val mimics, tiRNA-Val inhibitors, and corresponding negative controls  
113 were purchased from Sangon Biotech (Shanghai, China). Lipofectamine 3000  
114 transfection reagent (Invitrogen, USA) was used for cell transfection according to the  
115 manufacturer's instructions. The final concentrations of tiRNA-Val mimics and tiRNA-  
116 Val inhibitors were 50 nM, respectively.

117

118 **Cell proliferation assay**

119 Cell viability was assessed using CCK-8 assay (Cell Counting Kit-8, Sigma-  
120 Aldrich, USA) according to the manufacturer's instructions. Briefly,  $5 \times 10^3$  cells/well  
121 were seeded into 96-well plates. Proliferative activity was determined at the end of  
122 different experimental periods (24 h, 48 h, 72 h, and 96 h). When the medium changed  
123 from red to yellow, the absorbance value at a wavelength of 450 nm was detected using  
124 an enzyme-linked immunosorbent assay reader (Thermo Fisher Scientific, USA). The  
125 experiment was performed at least three times with similar results.

126

127 **Transwell migration assay**

128 The migratory ability of HRMECs was assessed using 24-well transwell migration  
129 chambers (8  $\mu$ m size, Corning, USA). Briefly,  $5 \times 10^4$  cells/well were resuspended in  
130 200  $\mu$ L serum-free DMEM and inoculated evenly into the inner chambers. The bottom  
131 chambers were replenished with 500  $\mu$ L of DMEM containing 20% FBS as an attractant.  
132 After 24 h, the cells migrated to the lower chamber through the hole, fixed with 4%

133 paraformaldehyde, and then stained with 0.1% crystal violet.

134

### 135 **Western blotting**

136 Cell lysates or mouse tissues were prepared using 1× cell lysis buffer (Cell  
137 Signaling Technology, USA) with 1 mM phenylmethylsulfonyl fluoride (PMSF;  
138 Sigma-Aldrich, USA). Protein lysate of 10–20 µg was run on 10–15% SDS-PAGE gel  
139 and transferred to a PVDF membrane (Roche, USA). The membrane was incubated for  
140 60 min at room temperature in 5% BSA solution. The following antibodies were used  
141 for the detection of protein expression: actin (1:1,000, Sigma, USA), angiogenin (Ang)  
142 (1:1,000, Abcam, USA), VEGF (1:1,000, Thermo Fisher Scientific, USA), ZO-1  
143 (1:1,000, Thermo Fisher Scientific, USA), ICAM-1 (1:1,000, Abcam, USA), Sirt1  
144 (1:1,000, Cell Signaling Technology, USA), and Hif-1 $\alpha$  (1:1,000, Cell Signaling  
145 Technology, USA). Anti-rabbit and anti-mouse peroxidase-conjugated secondary  
146 antibodies (1:2,000, Cell Signaling Technology, USA) were purchased from Jackson  
147 Immunoresearch, and the signal was visualized using western blotting luminol reagent  
148 (Thermo Fisher Scientific, USA).

149

### 150 **Quantification of mRNA by RT-qPCR**

151 Total RNA was isolated from cultured cells or mouse tissues using TRIzol reagent  
152 (Thermo Fisher Scientific, USA) according to the manufacturer's instructions. For  
153 mRNA quantification, cDNA was synthesized using SuperScript IV Reverse  
154 Transcriptase (Thermo Fisher Scientific, USA) with random primers. RT-qPCR was

155 performed using SYBR Green method. The primers used for amplification are listed in  
156 Supporting Information Table S1, and each experiment was repeated at least three times  
157 independently. The mRNA expression levels were calculated using  $\beta$ -actin as an  
158 internal control.

159

### 160 **Quantification of tiRNA by TaqMan RT-qPCR**

161 TaqMan RT-qPCR for specific quantification of tiRNA was performed as  
162 previously described. Briefly, total RNA was treated with T4 PNK (New England  
163 Biolabs, UK), followed by ligation to 3'-RNA adapter using T4 RNA ligase. Ligated  
164 RNA was then subjected to TaqMan RT-qPCR using SuperScript IV Reverse  
165 Transcriptase, 200 nM of TaqMan probe targeting the boundary of target RNA and 3'-  
166 adapter, and specific forward and reverse primers. The expression of tiRNA was  
167 calculated using 5S RNA as an internal control. The sequences of the TaqMan probes  
168 and primers are listed in Table S2 of the Supporting Information.

169

### 170 **RNA cleavage reaction *in vitro***

171 RNA cleavage was performed as previously described(17). Briefly,the incubation  
172 mixtures contained 20  $\mu$ g of total RNA extracted from HRMEC, 30 mM HEPES, pH  
173 6.8, 30 mM NaCl, 0.001% BSA, and recombinant human angiogenin protein (R&D  
174 Systems, USA) at concentrations of 0.1 $\mu$ M, 0.2 $\mu$ M, 0.5 $\mu$ M, 1.0 $\mu$ M, and 2.0  $\mu$ M.  
175 Incubation was performed at 37  $^{\circ}$ C for 30 min. The cleaved products were recovered



176 through phenol-chloroform extraction and ethanol precipitation. Then, the products  
177 were analyzed through northern blotting.

178

### 179 **Northern blotting**

180 Northern blotting for specific detection of small RNA was performed as previously  
181 described(18). Briefly, total RNA was separated using 15% urea PAGE. Gels were  
182 stained with SYBR Gold nucleic acid gel stain (Thermo Fisher Scientific, USA) and  
183 immediately imaged and transferred to positively charged nylon membranes (Roche,  
184 Switzerland). Subsequently, the membranes were air-dried and UV-crosslinked. The  
185 membranes were pre-hybridized with DIG Easy Hyb buffer (Roche, Switzerland) for  
186 at least 1 h at 45 °C. For the detection of specific small RNAs, the membranes were  
187 incubated overnight (12–16 h) at 45 °C with 10 nM 3'-DIG-labeled oligonucleotide  
188 probes synthesized by Sangon Biotech (Shanghai, China), as shown in Supporting  
189 Information Table S3. The membranes were washed twice with low stringent buffer (2×  
190 SSC with 0.1% (w/v) SDS) at 37 °C for 15 min each, then rinsed twice with high  
191 stringent buffer (0.1× SSC with 0.1% (w/v) SDS) at 37 °C for 5 min each, and finally  
192 rinsed in washing buffer (1× SSC) for 10 min. Following the washes, the membranes  
193 were transferred onto 1× blocking buffer (Roche) and incubated at room temperature  
194 for 2–3 h, after which DIG antibody (Roche) was added to the blocking buffer at a ratio  
195 of 1:10,000 and incubated for an additional 1/2 min at room temperature. The  
196 membranes were then washed four times in DIG washing buffer (1× maleic acid buffer,  
197 0.3% Tween-20) for 15 min each, rinsed in DIG detection buffer (0.1 M Tris-HCl, 0.1

198 M NaCl, pH 9.5) for 5 min, and then coated with CSPD ready-to-use reagent (Roche,  
199 Switzerland). The membranes were incubated in the dark with CSPD reagent for 15  
200 min at 37 °C before imaging using the Carestream imaging system.

201

## 202 **Luciferase assay**

203 HEK293T cells in a 24-well plate were cotransfected with pSIF-GFP or the  
204 indicated plasmids expressing tiRNA (0.8 µg/well), pRL-Sirt1-3' UTR (pRL-TK vector  
205 containing Sirt1 3'UTR) or pRLSirt1- 3'UTRm (pRL-TK vector containing mutant  
206 Sirt1 3'UTR) (0.1 µg/well), and pSV40-β-gal (Promega, Madison, WI, USA) (0.1  
207 µg/well) using lipofectamine 3000. HERMEC cells in a 24-well plate were co-  
208 transfected with the indicated tiRNA mimics, pRL-Sirt1-3'UTR (0.1 µg/well), and  
209 pSV40-β-gal (0.1 µg/well) using lipofectamine 3000. After transfection for 72 h, the  
210 cells were harvested for luciferase assay as previously described(17).

211

## 212 **Statistical Analysis**

213 Quantitative data are represented as mean ± SD. All images are representative of  
214 the studies with three to nine animals per group. Paired Student's *t*-test was used to  
215 assess the significant difference between the two groups. Statistical significance was  
216 set at  $p \leq 0.05$ .

217

## 218 **Results**

### 219 **tiRNA profile in DR retinal tissues from mice**

220 We constructed a mouse model with diabetic retinopathy according to a previously  
221 described method (19). The average fasting blood glucose level in DR mice was 19.0  
222 mmol/L, which is far higher than that in normal mice (4.8 mmol/L) (Fig 1a). The mRNA  
223 expression levels of VEGF and ICAM-1 were significantly upregulated in DR retinal  
224 tissues, while the mRNA expression level of ZO-1 was significantly downregulated  
225 (Fig 1b). The protein levels of VEGF, ICAM-1, and ZO-1 also changed based on the  
226 mRNA level (Fig 1c). To evaluate the degeneration of retinal neurons, we examined  
227 retinal ganglion cell layer (GCL) after 9 months of diabetes. Diabetic mice experienced  
228 10% loss of neurons in retinal GCL compared to that in non-diabetic mice (Fig 1d).  
229 To explore the physiological relevance of tiRNAs, TaqMan RT-qPCR quantification of  
230 all the tiRNAs that cleaved at the anticodon loop was performed for DR retinal tissues  
231 of mice. As shown in Fig 1e, the tiRNA profile was significantly altered in the retinal  
232 tissues of DR mice, especially tiRNA-Val, which was markedly upregulated. Therefore,  
233 we chose tiRNA-Val as a candidate for this study.

234

### 235 **tiRNA-Val was upregulated in DR retinal tissues and HRMEC at high glucose** 236 **condition**

237 tiRNA-Val was derived from mature tRNA-Val, which was cleaved at the  
238 anticodon loop with RNase (Fig 2a). We analyzed the expression level of tiRNA-Val  
239 through northern blotting. As shown in figure 2b, no significant differences were  
240 observed in the expression level of mature total tRNA-Val, but tiRNA-Val was  
241 significantly upregulated in the retinal tissues of DR mice. The mRNA and protein

242 levels of VEGF, ICAM-1, and ZO-1 significantly changed in the retinal tissues of DR  
243 mouse (Fig 2c and 2d). Furthermore, HRMECs treated with the indicated  
244 concentrations of glucose were used to simulate various diabetic conditions(20).  
245 HRMECs were cultured under normal glucose (5 mM) or high-glucose (33 mM)  
246 conditions. The expression level of tiRNA-Val was upregulated in HRMECs under high  
247 glucose conditions (Fig 2e).

248

### 249 **tiRNA-Val enhance cell proliferation in HRMEC**

250 DR is a proliferative manifestation of the retina accompanied by the growth of  
251 abnormal new blood vessels(21). We investigated the regulatory function of tiRNA-Val  
252 in cell proliferation by performing tiRNA-Val transfection (Fig. 3a). In view of the high  
253 expression of tiRNA-Val in the retinal tissues of DR mice and high glucose cell models,  
254 we examined the effect of tiRNA-Val on proliferation and migration of  
255 HRMECs. tiRNA-Val mimics and tiRNA-Val inhibitors were transfected into HRMECs,  
256 respectively, followed by CCK-8 and transwell migration assays. As shown in Fig. 3b,  
257 the viability of HRMECs increased markedly by transfection with tiRNA-Val mimics,  
258 and the enhanced effect of tiRNA-Val mimics on cell proliferation was observed  
259 beginning at 48 h. HRMECs transfected with tiRNA-Val mimics migrated significantly  
260 faster than those in the cells transfected with the negative control (Fig. 3c). To further  
261 investigate the effect of tiRNA-Val on cell apoptosis in HRMECs, FITC Annexin V  
262 apoptosis detection was performed. It was found that cells transfected with tiRNA-Val  
263 mimics could significantly inhibit cell apoptosis compared to that in cells transfected

264 with the negative control (Fig. 3d). In addition, HRMECs transfected with tiRNA-Val  
265 inhibitors to knock down tiRNA-Val decreased cell proliferation and migration (Fig.  
266 3e-g), but promoted cell apoptosis (Fig. 3h).

267

## 268 **Ang cleaves tRNA-Val to produce tiRNA-Val in mouse retinal tissues and HRMEC** 269 **cell models**

270 Previous studies have shown that tiRNA production is dependent on Ang, which is  
271 the fifth member of the RNase A superfamily(17, 22). The mRNA and protein levels  
272 significantly increased in the retinal tissues of DR mice (Fig. 4a and 4b). To test whether  
273 Ang could cleave tRNA-Val, total RNA from HRMECs was incubated with  
274 recombinant Ang *in vitro*. Northern blotting results showed that intact tRNA-Val was  
275 cleaved into short tRNA fragments of the length of tiRNA-Val (Fig. 4c). To test whether  
276 Ang could cleave tRNAs in cultured mammalian cells, HRMECs were transiently  
277 transfected with a plasmid expressing angiogenin. Total cellular RNA was extracted  
278 after transfection for 48 h. tiRNA-Val significantly increased in Ang-overexpressing  
279 cells (Fig. 4d–4e). However, tiRNA-Val levels were not detected in HRMECs  
280 transfected with Ang siRNA (Fig. 4f–4g). These results suggest that Ang is possibly an  
281 endonuclease for producing tiRNA-Val *in vivo*.

282

## 283 **tiRNA-Val increased Hif-1 $\alpha$ expression level by interacting with Sirt1 3'UTR**

284 tiRNAs are a new class of small RNAs with different mechanisms to regulate  
285 various cellular processes(12). Hif-1 $\alpha$  is a key mediator and target of retinal

286 neovascularization and diabetic retinopathy(23, 24), and during hypoxia, Sirtuin 1  
287 (Sirt1) is downregulated, which allows the acetylation and activation of Hif-1 $\alpha$ . We  
288 found that tiRNA-Val could pair with the 3'UTR of Sirt1 (Fig. 5a). Then, a luciferase  
289 reporter under the control of Sirt1 3'UTR was used to examine the effect of tiRNA-Val.  
290 As shown in Fig. 5b, the overexpression of tiRNA-Val significantly downregulated the  
291 activity of Sirt1 3'UTR, whereas the overexpression of tiRNA-Val had no effect on the  
292 mutant reporter. To further confirm whether tiRNA-Val targets Sirt1 3'UTR, a plasmid  
293 expressing mutant tiRNA-Val with ten mismatched bases was constructed, and we  
294 found that the mutant tiRNA-Val had no effect on the activity of Sirt1 3'UTR (Fig. 5c).  
295 To further examine the relationship among tiRNA-Val, Hif-1 $\alpha$ , and Sirt1, we performed  
296 transfection with tiRNA-Val mimics and found that Hif-1 $\alpha$  protein levels significantly  
297 increased, whereas Sirt1 protein levels decreased (Fig. 5d). Similarly, Hif-1 $\alpha$  protein  
298 level was upregulated, but the protein level of Sirt1 significantly decreased in the retinal  
299 tissue of DR mice (Fig. 5e). These data demonstrate that tiRNA-Val decreased Sirt1  
300 expression level by interacting with Sirt1 3'UTR leading to the accumulation of Hif-1 $\alpha$ .  
301

### 302 **Knockdown of tiRNA-Val ameliorates DR *in vivo***

303 To explore tiRNA *in vivo*, we knocked down tiRNA-Val in the subretinal space of  
304 DR mice with AAV -shtiRNA-Val. As shown in Fig. 6a and 6b, the expression level of  
305 tiRNA-Val decreased to 34.9%. The protein level of Sirt1 significantly increased when  
306 tiRNA-Val was knocked down, and Hif-1 $\alpha$  was upregulated (Fig. 6c). Importantly, the  
307 mRNA and protein levels of VEGF and ICAM-1 were downregulated, while ZO-1

308 increased significantly (Fig. 6d and 6e). Moreover, the loss of neurons in GCL was  
309 recovered compared to that in diabetic mice with control AAV (Fig 6f). These data  
310 demonstrated that the knockdown of tiRNA-Val ameliorated the symptoms of DR *in*  
311 *vivo*.

312

### 313 **Discussion**

314 In this study, we found that tRNA-derived small RNA, tiRNA-Val, was  
315 upregulated in the retinal tissues of DR mice. Ang, a member of the RNase A family,  
316 cleaved mature tRNA-Val to tiRNA-Val, which could enhance cell proliferation in  
317 HRMECs. Furthermore, we identified Sirt1 as the direct target of tiRNA-Val and  
318 demonstrated that tiRNA-Val negatively regulated Sirt1 in DR. It has been reported that  
319 hypoxia decreases Sirt1 expression, leading to the acetylation and activation of Hif-  
320 1 $\alpha$ (25). Our findings showed that tiRNA-Val downregulated the expression level of  
321 Sirt1, leading to the accumulation of Hif-1 $\alpha$ . The knockdown of tiRNA-Val in the  
322 subretinal space ameliorated DR via Sirt1-Hif-1 $\alpha$  axis *in vivo* (Fig. 7). These results  
323 suggest that tiRNA-Val may represent a potential therapeutic target for the treatment of  
324 DR.

325 High-throughput sequencing has resulted in the discovery of a new class of small  
326 RNAs: tRFs and tiRNAs derived from tRNAs. tiRNAs are activated under stress  
327 conditions and they modulate the stress response(26). Although they are named stress  
328 fragments, they are detected under non-stressed conditions(27). tiRNAs span the entire  
329 evolutionary tree, and biological roles have been identified for some tiRNAs in subsets

330 of organisms. For example, tRNA-Ala can inhibit protein synthesis and promote stress  
331 granule formation in a phospho eIF2 $\alpha$  independent manner, inhibiting translation by  
332 displacing the eukaryotic initiation factor eIF4G/A from mRNAs(22). A group of  
333 tRNAs competitively bind to cytochrome c, protecting cells from apoptosis during  
334 osmotic stress cytochrome c(28). tRNAs from the sperm contribute to intergenerational  
335 inheritance and alter the expression profile and RNA modifications of many genes(29).  
336 Here, we found that tRNA-Val negatively regulated Sirt1 in DR by interacting  
337 with Sirt1 3'UTR. Previous studies have shown that tRNA-derived fragments can  
338 repress endogenous genes to regulate cell proliferation and modulate DNA damage  
339 response(30, 31). It is possible that tRNAs play a key role in regulating gene expression  
340 levels in miRNA pathway or take part in other mechanisms.

341 SIRT1 is a nicotinamide adenosine dinucleotide (NAD)-dependent  
342 multifunctional deacetylase that removes acetyl groups from many proteins that can be  
343 implicated in diabetes(32). It was reported that Sirt1 was downregulated in DR  
344 patients(33). Sirt1 regulated the expression of Hif-1 $\alpha$ , especially under hypoxic  
345 condition; thus, it was involved in multiple biological processes associated with DR  
346 progression, such as apoptosis and proliferation(25). Here, we found that Sirt1 was  
347 downregulated by tRNA-Val, leading to the accumulation of Hif-1 $\alpha$  in HRMECs.  
348 Meanwhile, the knockdown of tRNA-Val with shtRNA-Val AAV subretinal injection  
349 ameliorates DR via Sirt1-Hif-1 $\alpha$  axis *in vivo*.

350 In summary, we identified and characterized a small RNA, tRNA-Val, that regulates  
351 diabetic retinopathy by modulating cell proliferation, and we have shown a potential



352 approach that can be used to improve diabetic retinopathy by knocking down tiRNA-

353 Val.

354

355 **Author contributions** YX and XX conceived and designed the study. YX and XX

356 performed the experiments and drafted the manuscript. HZ, QD, YLZ, CT and YYL

357 helped to analyze the data. XX supervised the experiments and revised the manuscript.

358 All of the authors reviewed the manuscript and approved the final version.

359

360 **Funding** This work was supported by the Chinese National Natural Science Foundation

361 (Grant Nos.81970846)

362

363 **Compliance with ethical standards**

364

365 **Conflicts of interest**

366 The authors disclose no conflicts.

367

368

369 **References**

370 1. Zhang X, Yang J, Zhong Y, Xu L, Wang O, Huang P, et al. Association of Bone Metabolic  
371 Markers With Diabetic Retinopathy and Diabetic Macular Edema in Elderly Chinese Individuals  
372 With Type 2 Diabetes Mellitus. *Am J Med Sci*. 2017;354(4):355-61.

373 2. Wong TY, Sabanayagam C. Strategies to Tackle the Global Burden of Diabetic Retinopathy:  
374 From Epidemiology to Artificial Intelligence. *Ophthalmologica*. 2020;243(1):9-20.

375 3. Cheung N, Mitchell P, Wong TY. Diabetic retinopathy. *Lancet*. 2010;376(9735):124-36.

376 4. Giacco F, Brownlee M. Oxidative stress and diabetic complications. *Circ Res*.  
377 2010;107(9):1058-70.

- 378 5. Stachurska A, Zorro MM, van der Sijde MR, Withoff S. Small and Long Regulatory RNAs in  
379 the Immune System and Immune Diseases. *Front Immunol.* 2014;5:513.
- 380 6. Yan B, Yao J, Liu JY, Li XM, Wang XQ, Li YJ, et al. lncRNA-MIAT regulates microvascular  
381 dysfunction by functioning as a competing endogenous RNA. *Circ Res.* 2015;116(7):1143-56.
- 382 7. Bao XY, Cao J. MiRNA-138-5p protects the early diabetic retinopathy by regulating NOVA1.  
383 *Eur Rev Med Pharmacol Sci.* 2019;23(18):7749-56.
- 384 8. Lee YS, Shibata Y, Malhotra A, Dutta A. A novel class of small RNAs: tRNA-derived RNA  
385 fragments (tRFs). *Genes Dev.* 2009;23(22):2639-49.
- 386 9. Peng H, Shi J, Zhang Y, Zhang H, Liao S, Li W, et al. A novel class of tRNA-derived small  
387 RNAs extremely enriched in mature mouse sperm. *Cell Res.* 2012;22(11):1609-12.
- 388 10. Honda S, Loher P, Shigematsu M, Palazzo JP, Suzuki R, Imoto I, et al. Sex hormone-  
389 dependent tRNA halves enhance cell proliferation in breast and prostate cancers. *Proc Natl Acad  
390 Sci U S A.* 2015;112(29):E3816-25.
- 391 11. Kumar P, Kuscu C, Dutta A. Biogenesis and Function of Transfer RNA-Related Fragments  
392 (tRFs). *Trends Biochem Sci.* 2016;41(8):679-89.
- 393 12. Kim HK. Transfer RNA-Derived Small Non-Coding RNA: Dual Regulator of Protein  
394 Synthesis. *Mol Cells.* 2019;42(10):687-92.
- 395 13. Gebetsberger J, Wyss L, Mleczyk AM, Reuther J, Polacek N. A tRNA-derived fragment  
396 competes with mRNA for ribosome binding and regulates translation during stress. *RNA Biol.*  
397 2017;14(10):1364-73.
- 398 14. Goodarzi H, Liu X, Nguyen HC, Zhang S, Fish L, Tavazoie SF. Endogenous tRNA-Derived  
399 Fragments Suppress Breast Cancer Progression via YBX1 Displacement. *Cell.* 2015;161(4):790-  
400 802.
- 401 15. Kim HK, Fuchs G, Wang S, Wei W, Zhang Y, Park H, et al. A transfer-RNA-derived small RNA  
402 regulates ribosome biogenesis. *Nature.* 2017;552(7683):57-62.
- 403 16. Rakoczy PE, Brankov M, Fonceca A, Zaknich T, Rae BC, Lai CM. Enhanced recombinant  
404 adeno-associated virus-mediated vascular endothelial growth factor expression in the adult  
405 mouse retina: a potential model for diabetic retinopathy. *Diabetes.* 2003;52(3):857-63.
- 406 17. Fu H, Feng J, Liu Q, Sun F, Tie Y, Zhu J, et al. Stress induces tRNA cleavage by angiogenin in  
407 mammalian cells. *FEBS Lett.* 2009;583(2):437-42.
- 408 18. Zhang Y, Zhang X, Shi J, Tuorto F, Li X, Liu Y, et al. Dnmt2 mediates intergenerational  
409 transmission of paternally acquired metabolic disorders through sperm small non-coding RNAs.  
410 *Nat Cell Biol.* 2018;20(5):535-40.
- 411 19. Bapputty R, Talahalli R, Zarini S, Samuels I, Murphy R, Gubitosi-Klug R. Montelukast  
412 Prevents Early Diabetic Retinopathy in Mice. *Diabetes.* 2019;68(10):2004-15.
- 413 20. Wang AL, Rao VR, Chen JJ, Lussier YA, Rehman J, Huang Y, et al. Role of FAM18B in diabetic  
414 retinopathy. *Mol Vis.* 2014;20:1146-59.
- 415 21. Barot M, Gokulgandhi MR, Patel S, Mitra AK. Microvascular complications and diabetic  
416 retinopathy: recent advances and future implications. *Future Med Chem.* 2013;5(3):301-14.
- 417 22. Ivanov P, Emara MM, Villen J, Gygi SP, Anderson P. Angiogenin-induced tRNA fragments  
418 inhibit translation initiation. *Mol Cell.* 2011;43(4):613-23.
- 419 23. Lin M, Chen Y, Jin J, Hu Y, Zhou KK, Zhu M, et al. Ischaemia-induced retinal  
420 neovascularisation and diabetic retinopathy in mice with conditional knockout of hypoxia-  
421 inducible factor-1 in retinal Muller cells. *Diabetologia.* 2011;54(6):1554-66.

- 422 24. Li HY, Yuan Y, Fu YH, Wang Y, Gao XY. Hypoxia-inducible factor-1alpha: A promising  
423 therapeutic target for vasculopathy in diabetic retinopathy. *Pharmacol Res.* 2020;159:104924.
- 424 25. Ryu DR, Yu MR, Kong KH, Kim H, Kwon SH, Jeon JS, et al. Sirt1-hypoxia-inducible factor-  
425 1alpha interaction is a key mediator of tubulointerstitial damage in the aged kidney. *Aging Cell.*  
426 2019;18(2):e12904.
- 427 26. Raina M, Ibba M. tRNAs as regulators of biological processes. *Front Genet.* 2014;5:171.
- 428 27. Thompson DM, Parker R. Stressing out over tRNA cleavage. *Cell.* 2009;138(2):215-9.
- 429 28. Saikia M, Jobava R, Parisien M, Putnam A, Krokowski D, Gao XH, et al. Angiogenin-cleaved  
430 tRNA halves interact with cytochrome c, protecting cells from apoptosis during osmotic stress.  
431 *Mol Cell Biol.* 2014;34(13):2450-63.
- 432 29. Chen Q, Yan M, Cao Z, Li X, Zhang Y, Shi J, et al. Sperm tsRNAs contribute to  
433 intergenerational inheritance of an acquired metabolic disorder. *Science.* 2016;351(6271):397 -  
434 400.
- 435 30. Maute RL, Schneider C, Sumazin P, Holmes A, Califano A, Basso K, et al. tRNA-derived  
436 microRNA modulates proliferation and the DNA damage response and is down-regulated in B  
437 cell lymphoma. *Proc Natl Acad Sci U S A.* 2013;110(4):1404-9.
- 438 31. Lalaouna D, Carrier MC, Semsey S, Brouard JS, Wang J, Wade JT, et al. A 3' external  
439 transcribed spacer in a tRNA transcript acts as a sponge for small RNAs to prevent transcriptional  
440 noise. *Mol Cell.* 2015;58(3):393-405.
- 441 32. Karbasforooshan H, Karimi G. The role of SIRT1 in diabetic retinopathy. *Biomed*  
442 *Pharmacother.* 2018;97:190-4.
- 443 33. Mishra M, Duraisamy AJ, Kowluru RA. Sirt1: A Guardian of the Development of Diabetic  
444 Retinopathy. *Diabetes.* 2018;67(4):745-54.

445

446

Figure 1

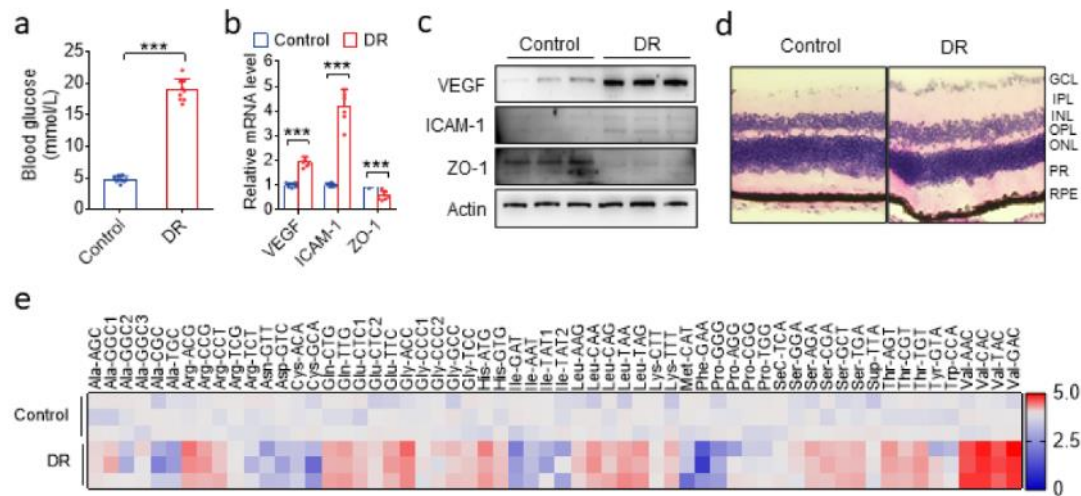

447

448 **Fig. 1. tiRNA profile between normal and DR retinal tissues in mice**

449 (a) Blood glucose level in normal and DR mice. Data are represented as the mean  $\pm$  SD,  $n = 9$ , \*\*\* $p <$

450 0.001 vs. normal group. Statistical significance was assessed by two-tailed Student's  $t$ -test. (b) qRT-

451 PCR analysis of *VEGF*, *ICAM-1*, and *ZO-1* levels in the entire retina of DR mice. Data are

452 represented as the mean  $\pm$  SD,  $n = 6$ , \*\*\* $p <$  0.001 vs. normal group. Statistical significance was

453 assessed by two-tailed Student's  $t$ -test. (c) Western blotting analysis of *VEGF*, *ICAM-1*, and *ZO-1*

454 expression in the entire retina of normal and DR mice. (d) Representative micrographs of H&E

455 staining of the retinal tissue in mice treated as indicated. (e) Heatmap of differently expressed tiRNAs

456 between normal and DR mice retinal tissues by TaqMan RT-qPCR. GCL: ganglion cell layer;

457 IPL: inner plexiform layer; INL: inner nuclear layer; OPL: outer plexiform layer; ONL: outer nuclear

458 layer; PR: photoreceptors; RPE: retinal pigment epithelium; DR: diabetic retinopathy.

459

460

Figure 2

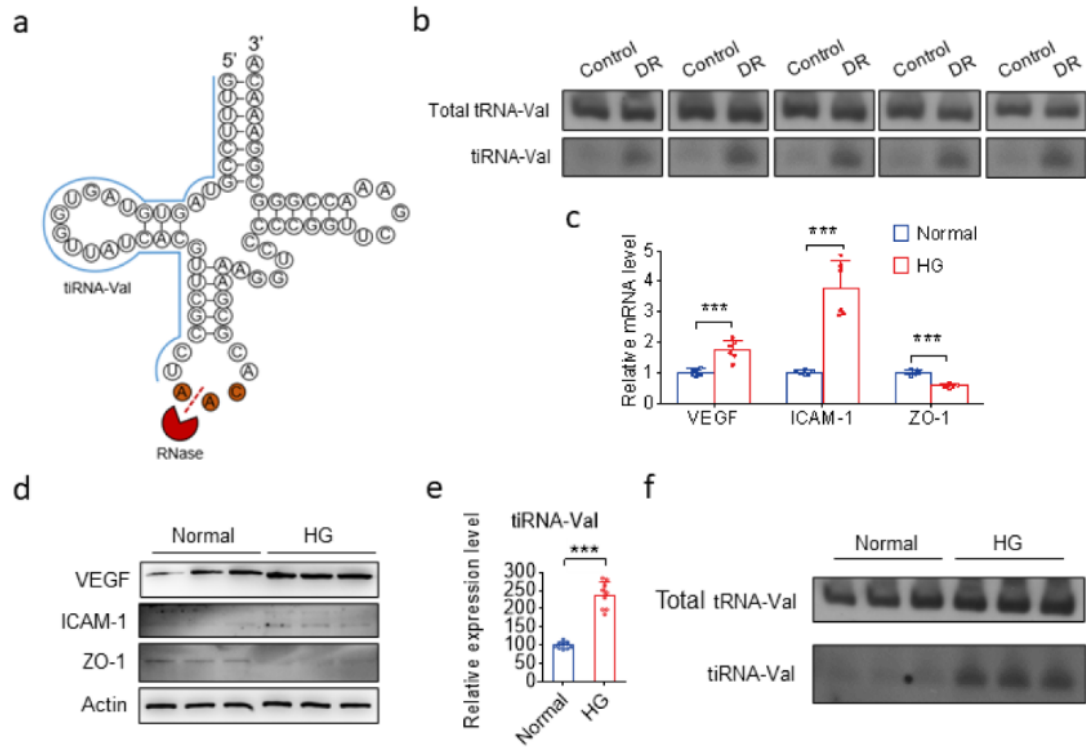

461

462

463 **Fig. 2. The expression level of tiRNA-Val was upregulated in DR mice and high glucose cell**  
 464 **model**

465 (a)Structure of tiRNA-Val and total tRNA-Val. (b) Expression level of tiRNA-Val identified in five

466 pairs of normal and DR retinal tissues by northern blot.(c)qRT-PCR analysis of *VEGF*, *ICAM-1*, and

467 *ZO-1* levels in normal and high glucose HRMEC.Data are represented as the mean  $\pm$ SD, n = 6, \*\*\*

468  $p < 0.001$  vs. normal group. Statistical significance was assessed by two-tailed Student's *t*-test. (d)

469 Western blotting analysis of *VEGF*, *ICAM-1*, and *ZO-1* expression in HRMECs treated mice as

470 indicated. (e)Expression level of tiRNA-Val identified by TaqMan RT-qPCR in normal and high

471 glucose HRMEC. Data are represented as the mean  $\pm$ SD, n = 9, \*\*\* $p < 0.001$  vs. normal group.

472 Statistical significance was assessed by two-tailed Student's *t*-test. (f)Expression level of tiRNA-Val

473 identified in 3 pairs of normal and high glucose HRMEC by northern blotting.DR: diabetic

474 retinopathy; NG: normal glucose;HG:high glucose.

475

Figure 3

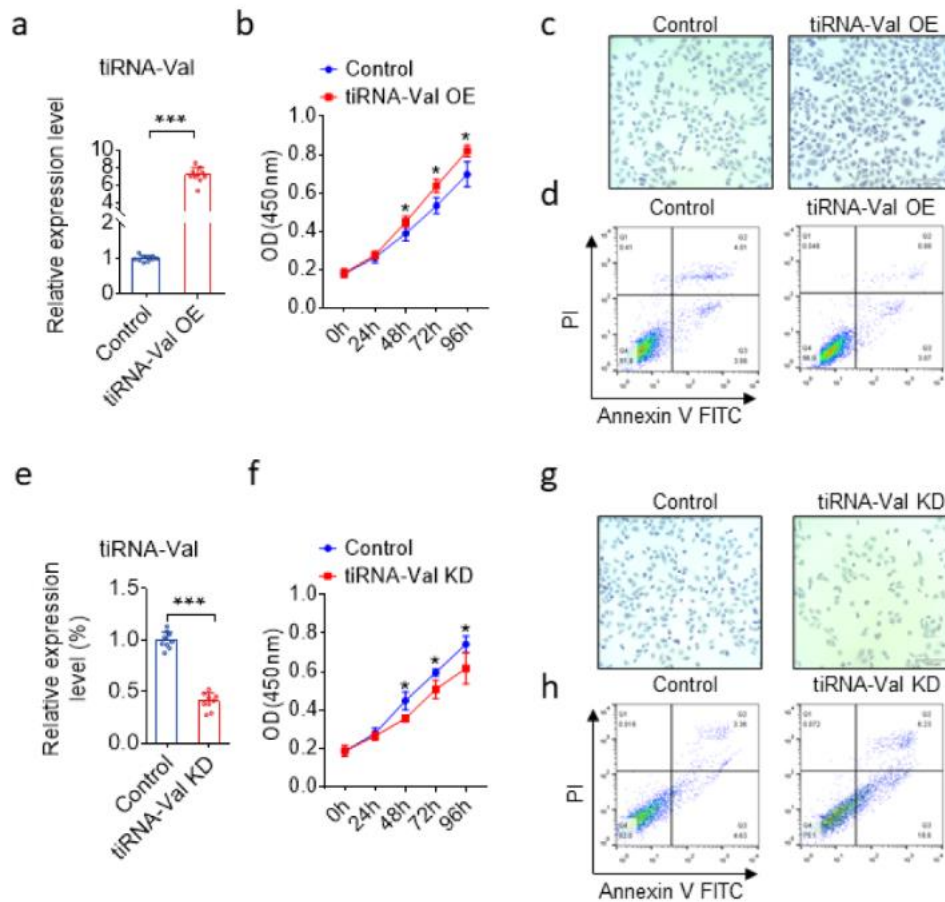

476

477 **Fig. 3. The regulatory function of tiRNA-Val in HRMEC cells**

478 (a) TaqMan RT-qPCR analysis of tiRNA-Val expression in HRMEC cells transfected with tiRNA-

479 Val mimics and scramble sequence RNA. HRMEC cells transfected with scramble sequence RNA

480 as control group. Data are represented as the mean  $\pm$  SD,  $n = 10$ , \*\*\* $p < 0.001$  vs. control group.

481 Statistical significance was assessed by two-tailed Student's  $t$ -test.(b)CCK-8 assay for HRMEC cells

482 transfected with tiRNA-Val mimics compared to scramble sequence RNA. HRMEC cells

483 transfected with scramble sequence RNA as control group. Data are represented as the mean  $\pm$  SD,

484  $n = 9$ , \*\*\* $p < 0.001$  vs. control group. Statistical significance was assessed by two-tailed Student's  $t$ -

485 test.(c)Migration assay for HERMEC cells transfected with tiRNA-Val mimics and scramble

486 sequence RNA. (d) Detection of apoptosis by concurrent staining with Annexin V-FITC and PI.

487 HRMEC cells transfected with tiRNA-Val mimics (left panel) or scramble sequence RNA (right  
488 panel). Cells were subsequently stained with Annexin V-FITC conjugate and PI and were measured  
489 by flow cytometry. Live cells were both Annexin V and PI negative. At early stage of apoptosis, the  
490 cells bound Annexin V while still excluding PI. At the late stage of apoptosis, they bound Annexin  
491 V-FITC and stained brightly with PI. (e) TaqMan RT-qPCR analysis of tiRNA-Val expression in  
492 HRMEC cells transfected with siRNA of tiRNA-Val and scramble sequence RNA. HRMEC cells  
493 transfected with scramble sequence RNA as control group. Data are represented as the mean  $\pm$  SD,  
494  $n = 9$ ,  $***p < 0.001$  vs. control group. Statistical significance was assessed by two-tailed Student's  $t$ -  
495 test. (f) CCK-8 assay for HRMEC cells transfected with siRNA of tiRNA-Val compared to scramble  
496 sequence RNA. (g) Migration assay for HRMEC cells transfected with siRNA of tiRNA-Val  
497 compared to scramble sequence RNA. (h) Detection of apoptosis by concurrent staining with  
498 Annexin V-FITC and PI. HRMEC cells transfected with si-tiRNA-Val (left panel) or scramble  
499 sequence RNA (right panel). Cells were subsequently stained with Annexin V-FITC conjugate and  
500 PI as described in (b).



Figure 4

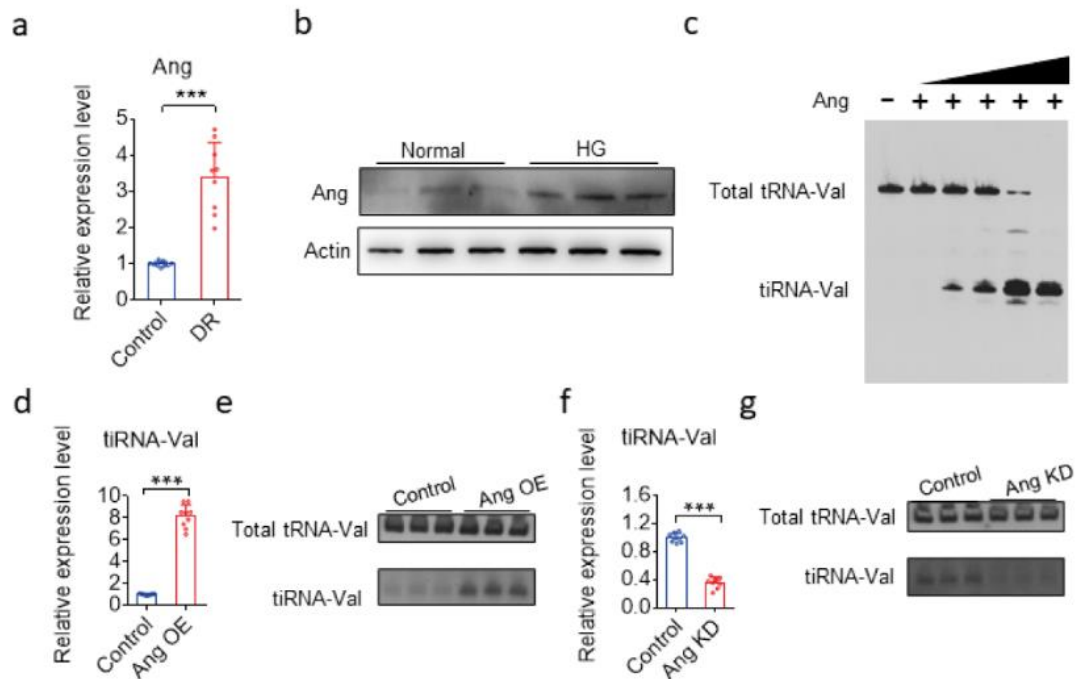

501

502

503 **Fig. 4. Ang cleaves tRNA-Val to produce tiRNA-Val in mice retinal tissues and HRMEC cell**  
 504 **models**

505 (a) TaqManqRT-PCR analysis of *angiogenin*(*Ang*)levels in the entire retina of DR mice. Data are  
 506 represented as the mean  $\pm$  SD, n = 9, \*\*\* $p$ < 0.001 vs. normal group. Statistical significance was

507 assessed by two-tailed Student's  $t$ -test. (b) Western blotting analysis of Ang expression in the entire

508 retina of normal and DR mice.(c)tiRNA-Val can be cleaved at the anticodon loop depending on the

509 recombinant angiogenin(0.1, 0.2, 0.5, 1.0 and 2.0  $\mu$ M) in vitro.(d)TaqMan RT-qPCR analysis

510 of tiRNA-Val expression in HRMEC cells transfected with Ang overexpression plasmid and empty

511 vector in normal glucose. HRMEC cells transfected with empty vector as control group. Data are

512 represented as the mean  $\pm$  SD, n = 9, \*\*\* $p$ < 0.001 vs. control group. Statistical significance was

513 assessed by two-tailed Student's  $t$ -test. (e)Overexpression of Ang in HRMEC with normal glucose

514 to analyze tiRNA-Val level by northern blotting.(f) Knockdown of Ang in HRMEC with high

515 glucose level to analyze tiRNA-Val level by northern blotting.(g)TaqMan RT-qPCR analysis of  
516 tiRNA-Val expression in HRMEC cells transfected with siRNA of Ang andscramble sequence RNA  
517 in high glucose. HRMEC cells transfected withscramble sequence RNA as control group. Data are  
518 represented as the mean  $\pm$  SD, n = 9, \*\*\* $p$  < 0.001 vs. control group. Statistical significance was  
519 assessed by two-tailed Student's  $t$ -test.  
520

Figure 5

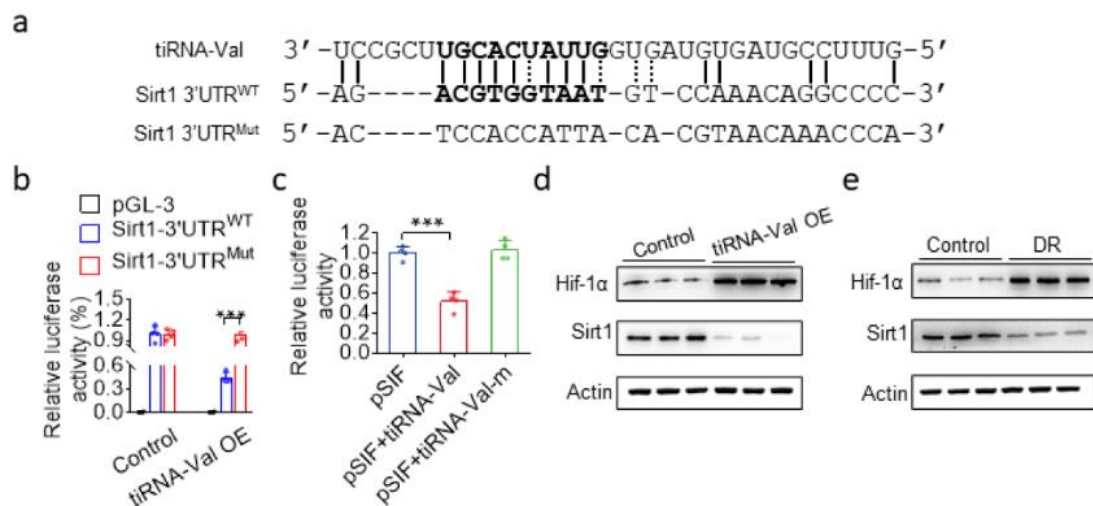

521

522

523 **Fig. 5. tiRNA-Val targets sirt1 3'UTR leading to the accumulation of Hif-1 $\alpha$**

524 (a)Sequence alignment of tiRNA-Val with the 3'UTRs of Sirt1. The seed region of tiRNA-Val is  
525 indicated in bold.(b)Luciferase assay indicated the mutation of the predicted tiRNA-Val binding site  
526 in Sirt1 3'UTR,and it abrogated the repressive effect of tiRNA-Val on the activity of Sirt1 3'UTR.  
527 Data are represented as the mean  $\pm$  SD, n = 4, \*\*\* $p$  < 0.001 vs. Sirt1 3'UTR<sup>WT</sup> group. Statistical  
528 significance was assessed by two-tailed Student's  $t$ -test. (c)Luciferase assay indicated the mutation  
529 of the tiRNA-Val seed region, and it abrogated the repressive effect of tiRNA-Val on the activity of  
530 Sirt1 3'UTR. Data are represented as the mean  $\pm$  SD, n = 4, \*\*\* $p$  < 0.001 vs. pSIF+tiRNA-Val group.

531 Statistical significance was assessed by two-tailed Student's *t*-test. (d)Western blotting analysis of  
 532 Hif-1 $\alpha$  and Sirt1 expression in HRMECs transfected with tiRNA-Val mimics and the scramble  
 533 sequence RNA.(e)Western blotting analysis of Hif-1 $\alpha$  and Sirt1 expression in the entire retina of  
 534 normal and DR mice. WT: wile type; DR: diabetic retinopathy; Mut:mutation; OE: overexpression.  
 535  
 536

Figure 6

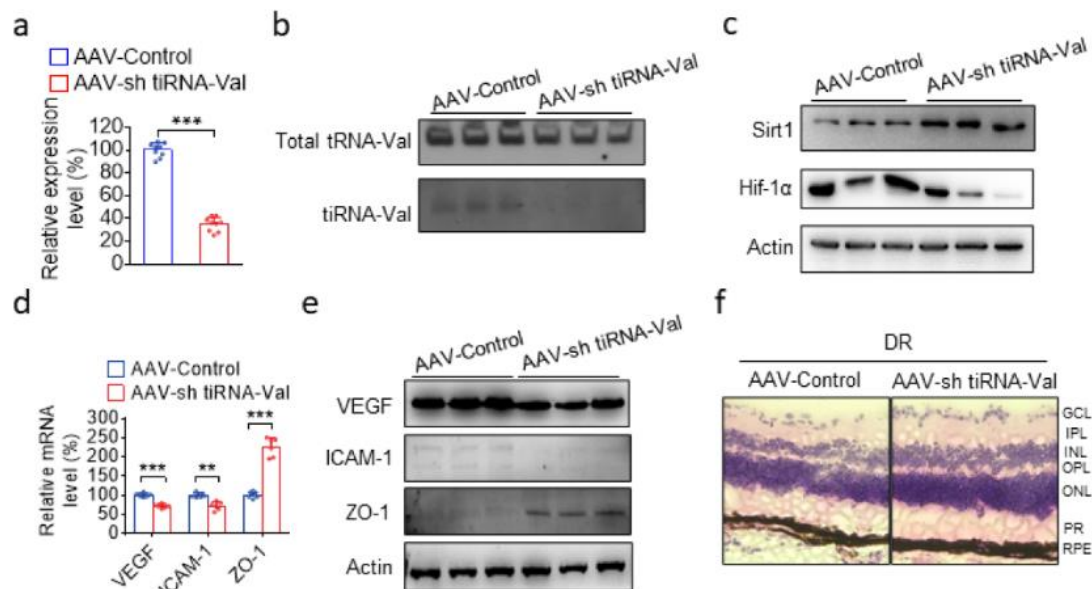

537

538

539 **Fig. 6. Knockdown of tiRNA-Val in subretinal space ameliorates the symptoms of DR *in vivo***

540 (a)TaqManqRT-PCR analysis of tiRNA-Val levels in the entire retina of DR mice after shtiRNA-

541 Val AAV injection. Data are represented as the mean  $\pm$  SD, n = 9, \*\*\**p*< 0.001 vs. normal group.

542 Statistical significance was assessed by two-tailed Student's *t*-test. (b)Northern blot detection of

543 tiRNA-Val level in DR mice retinal tissues after shtiRNA-Val AAV injection.(c)Western blotting

544 analysis of Hif-1 $\alpha$  and Sirt1 expression in DR mice retinal tissues after shtiRNA-Val AAV

545 injection.(d)TaqManqRT-PCR analysis of *VEGF*, *ICAM-1*, and *ZO-1* levels in the entire retina of DR

546 mice after shtRNA-Val AAV injection. Data are represented as the mean  $\pm$  SD, n = 6, \*\*\* $p$  < 0.001  
547 vs. normal group. Statistical significance was assessed by two-tailed Student's  $t$ -test. (e) Western  
548 blotting analysis of *VEGF*, *ICAM-1*, and *ZO-1* expression in DR mice retinal tissues after shtRNA-  
549 Val AAV injection. (f) Representative micrographs of H&E staining of retinal tissue in DR mice after  
550 tiRNA-Val AAV injection. GCL: ganglion cell layer; IPL: inner plexiform layer; INL: inner nuclear  
551 layer; OPL: outer plexiform layer; ONL: outer nuclear layer; PR: photoreceptors; RPE: retinal pigment  
552 epithelium; DR: diabetic retinopathy.  
553

Figure 7

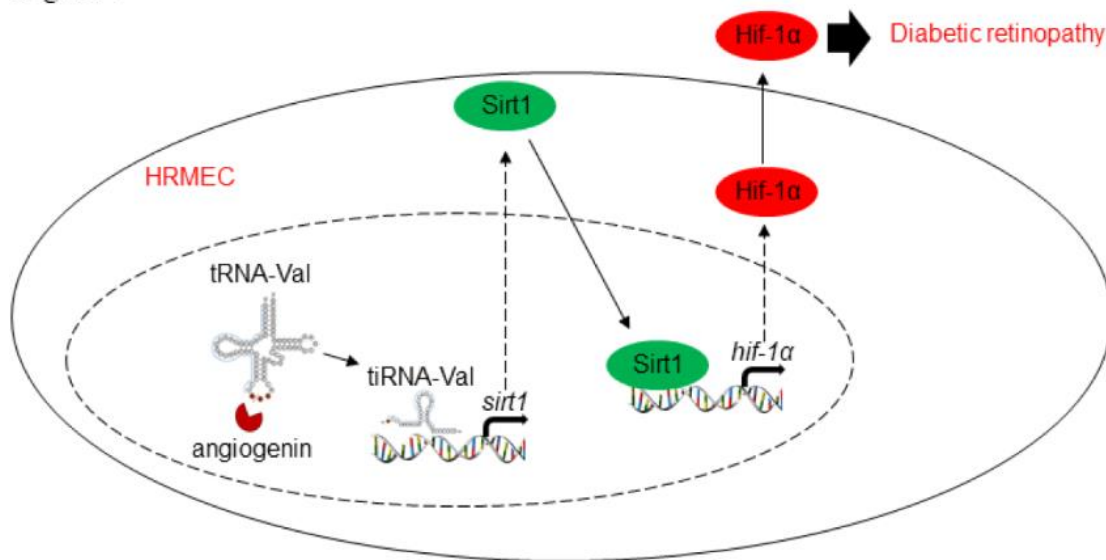

554

555 **Fig. 7. Model for tiRNA-Val regulating diabetic retinopathy via Sirt1-Hif-1 $\alpha$  axis**

556 Model for tiRNA-Val regulating diabetic retinopathy via Sirt1-Hif-1 $\alpha$  axis
